# Supplementary material for: Oral Health Related Quality of Life of Patients Suffering from Acute Dental Pain of Endodontic Origin
Source: Research Square preprint supplement (doi:10.21203/rs.3.rs-637827/v1), 2021-06-25

Supplementary file:


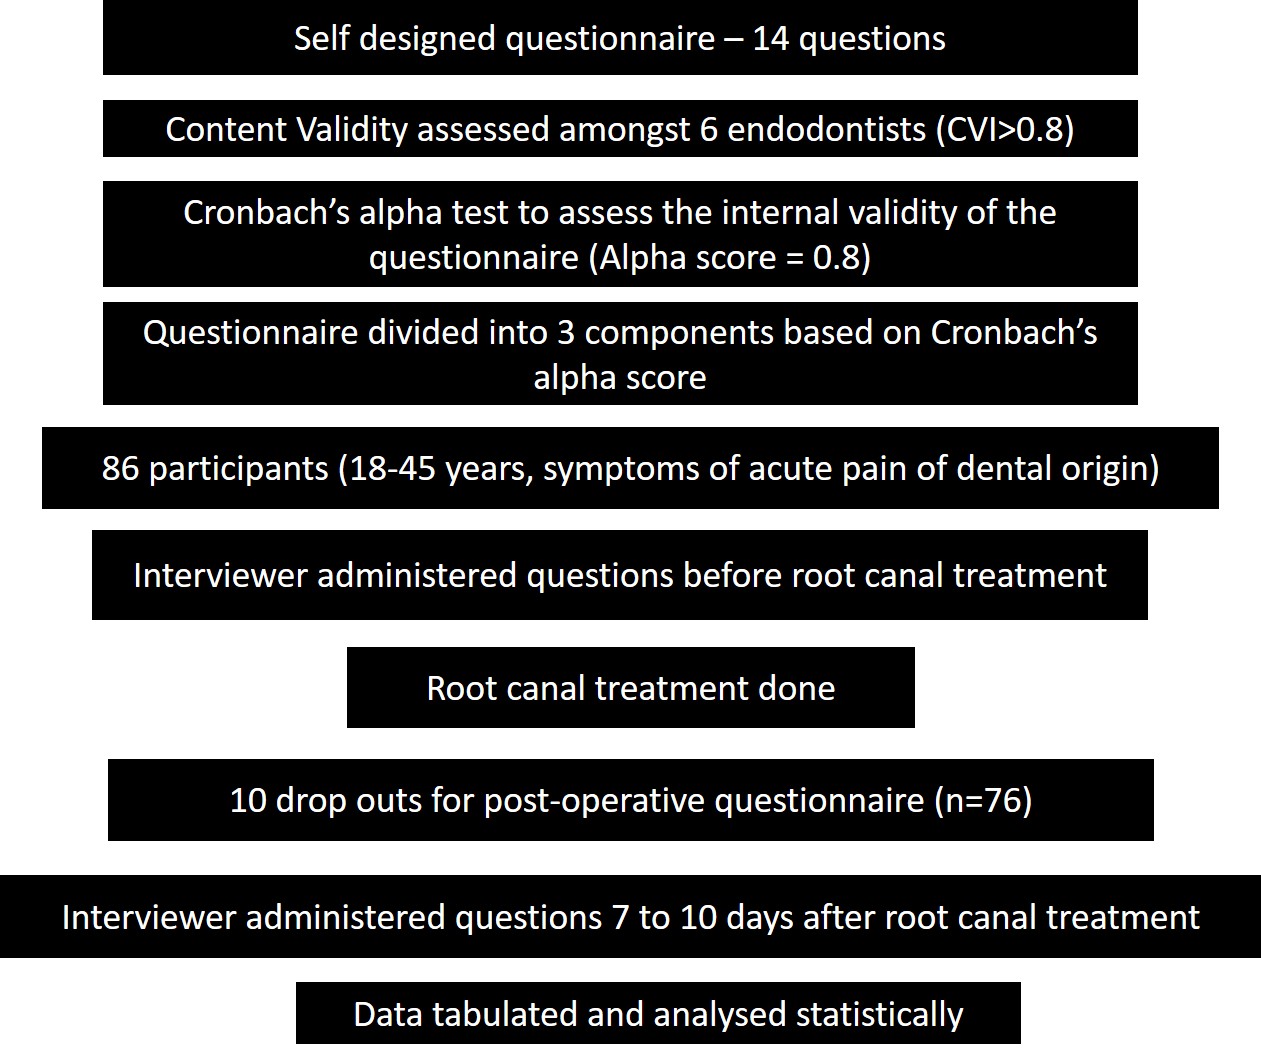
Study methodology:

Graphical representation of Study results:


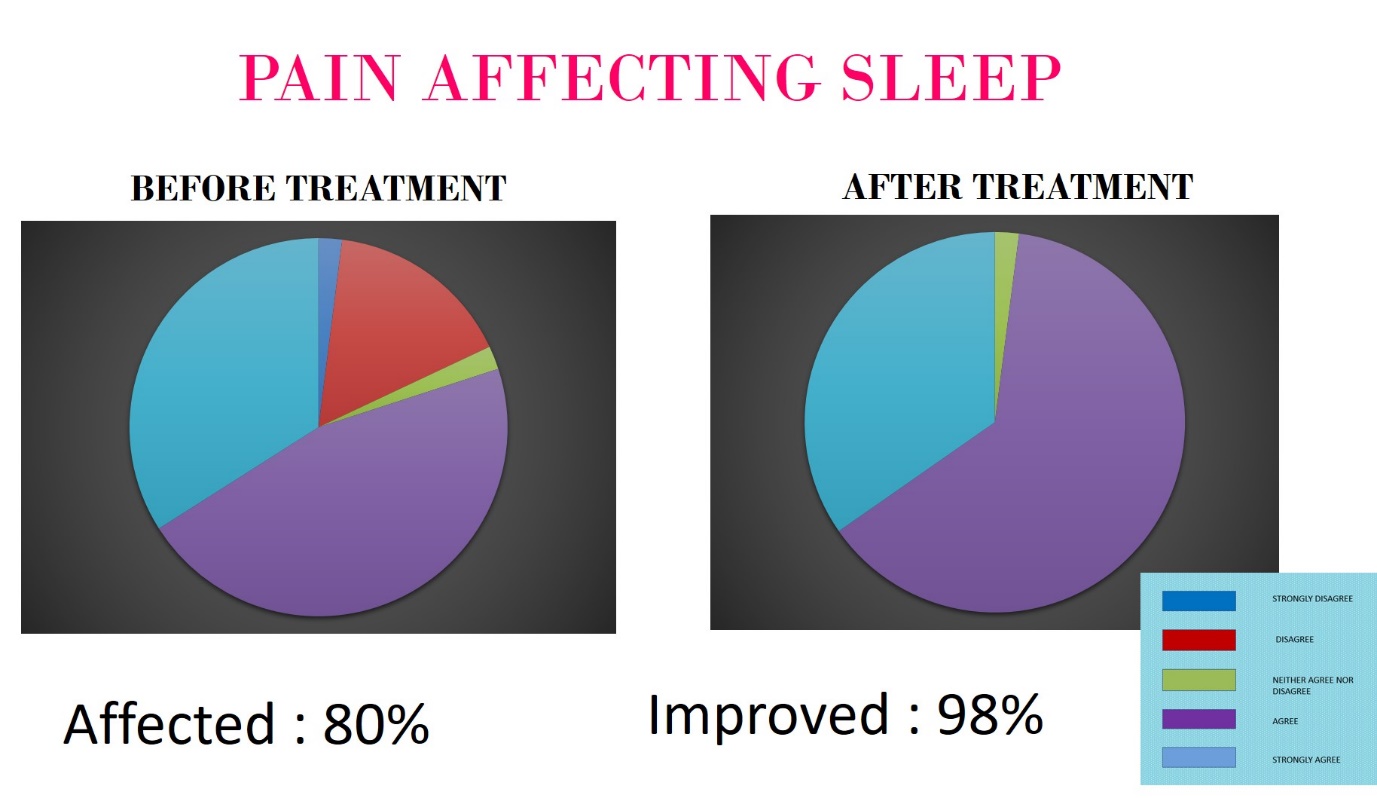


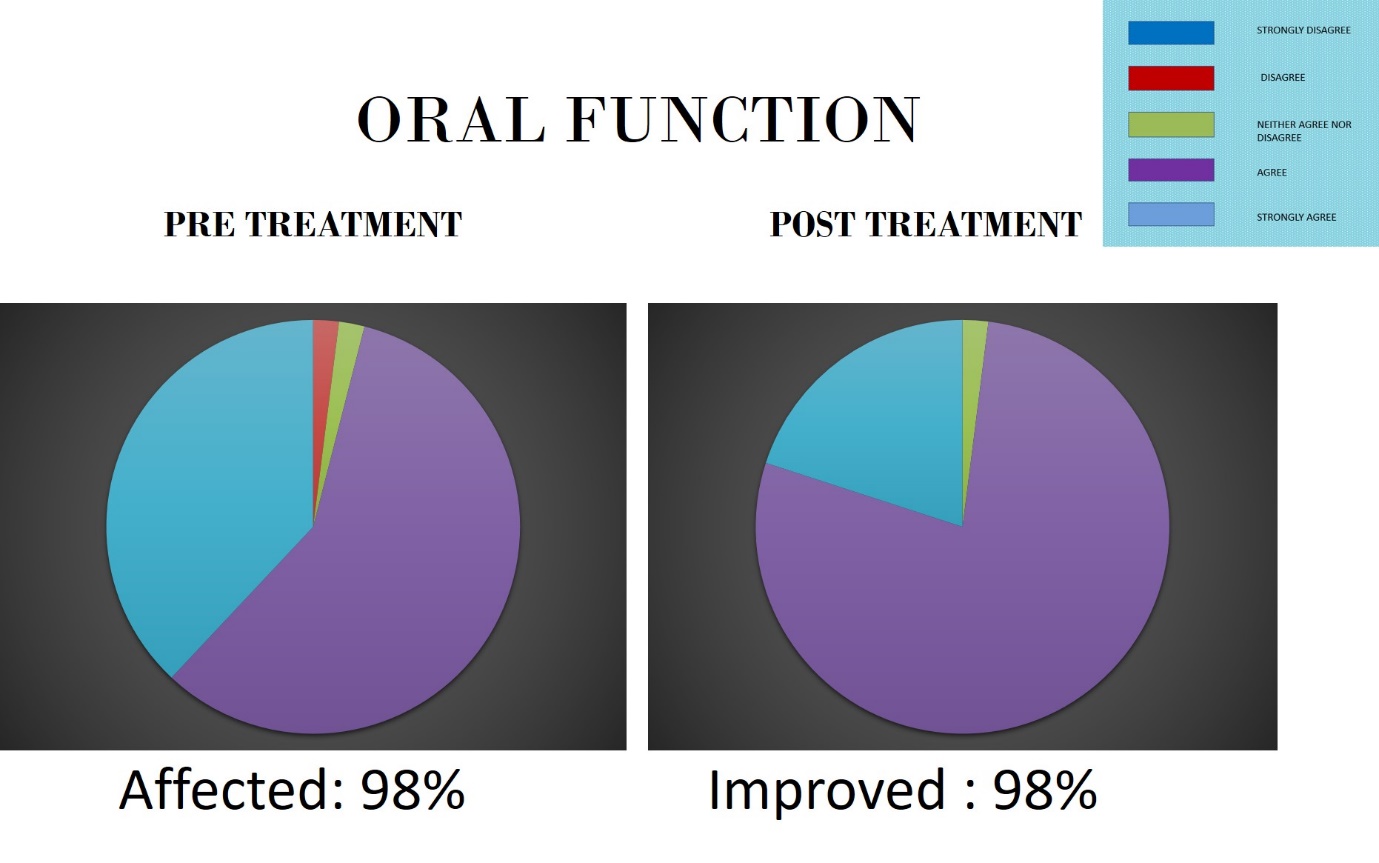

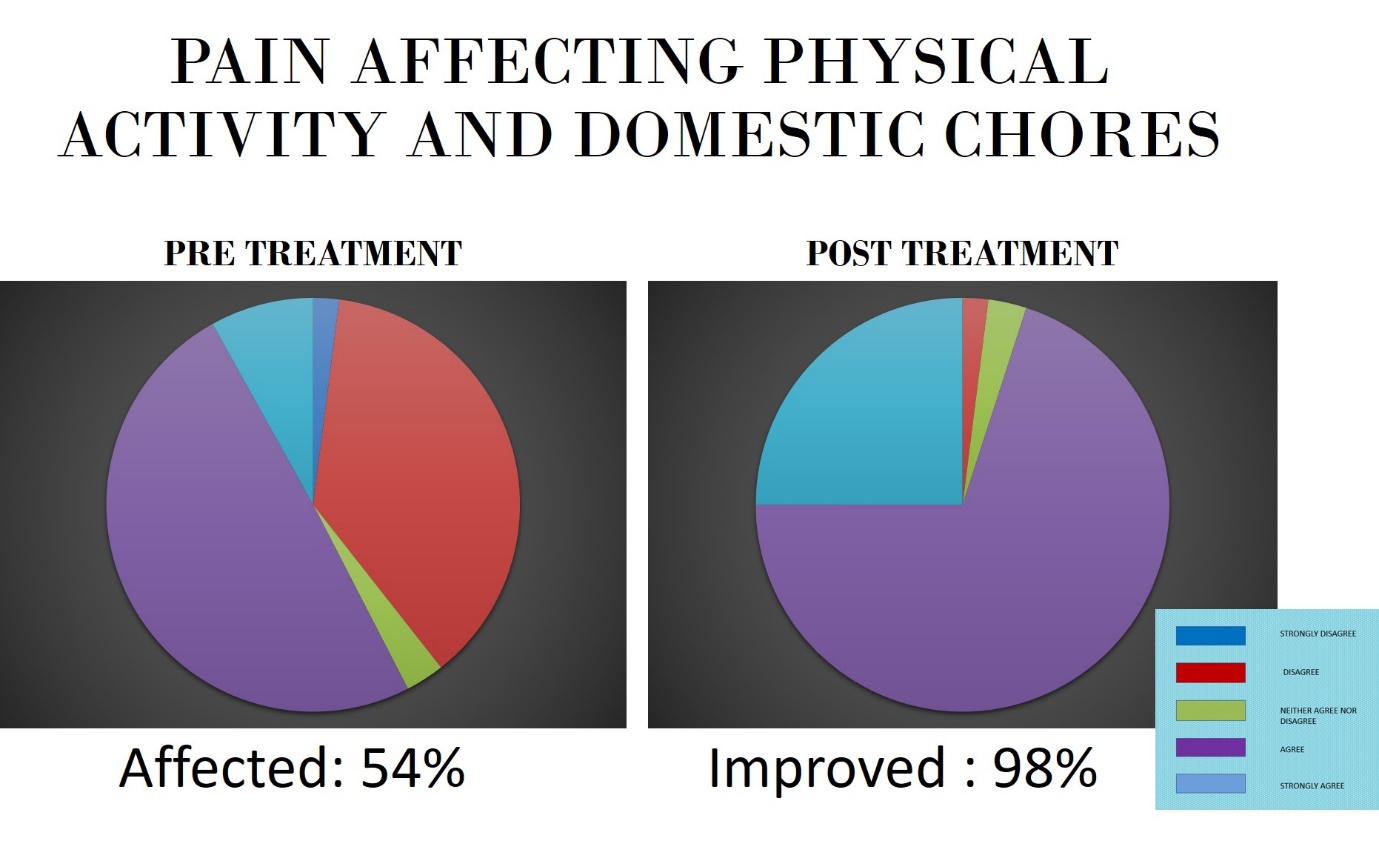


Psychological dimension:


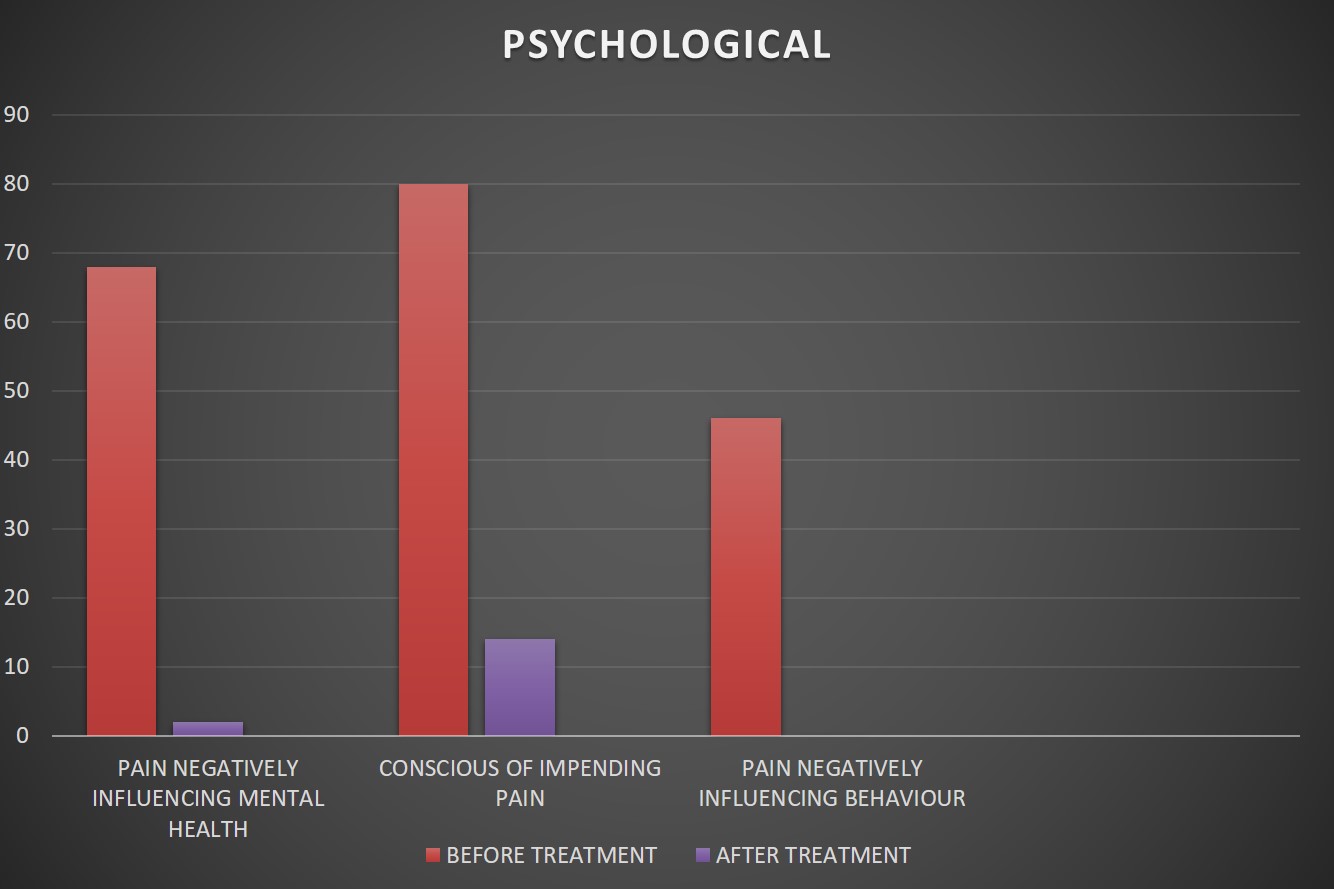


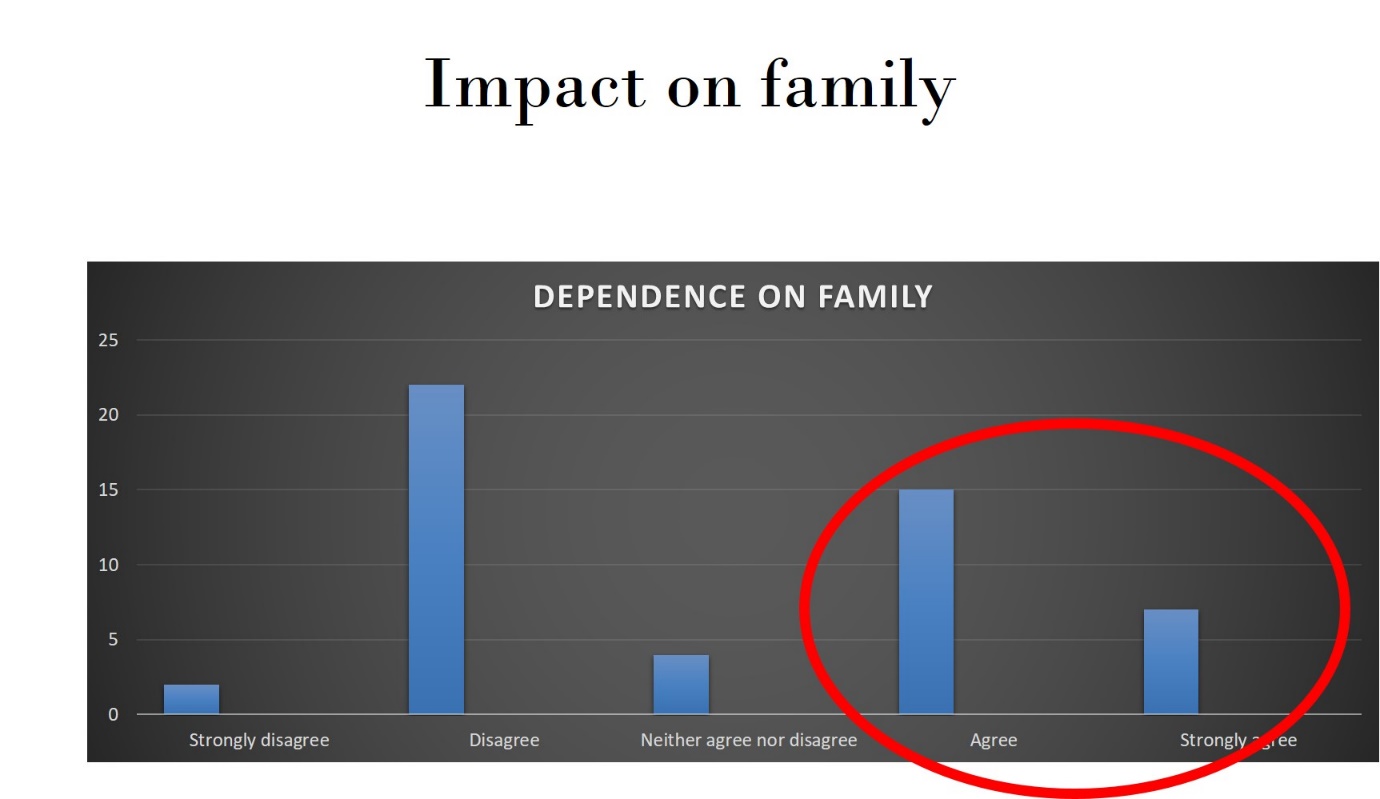

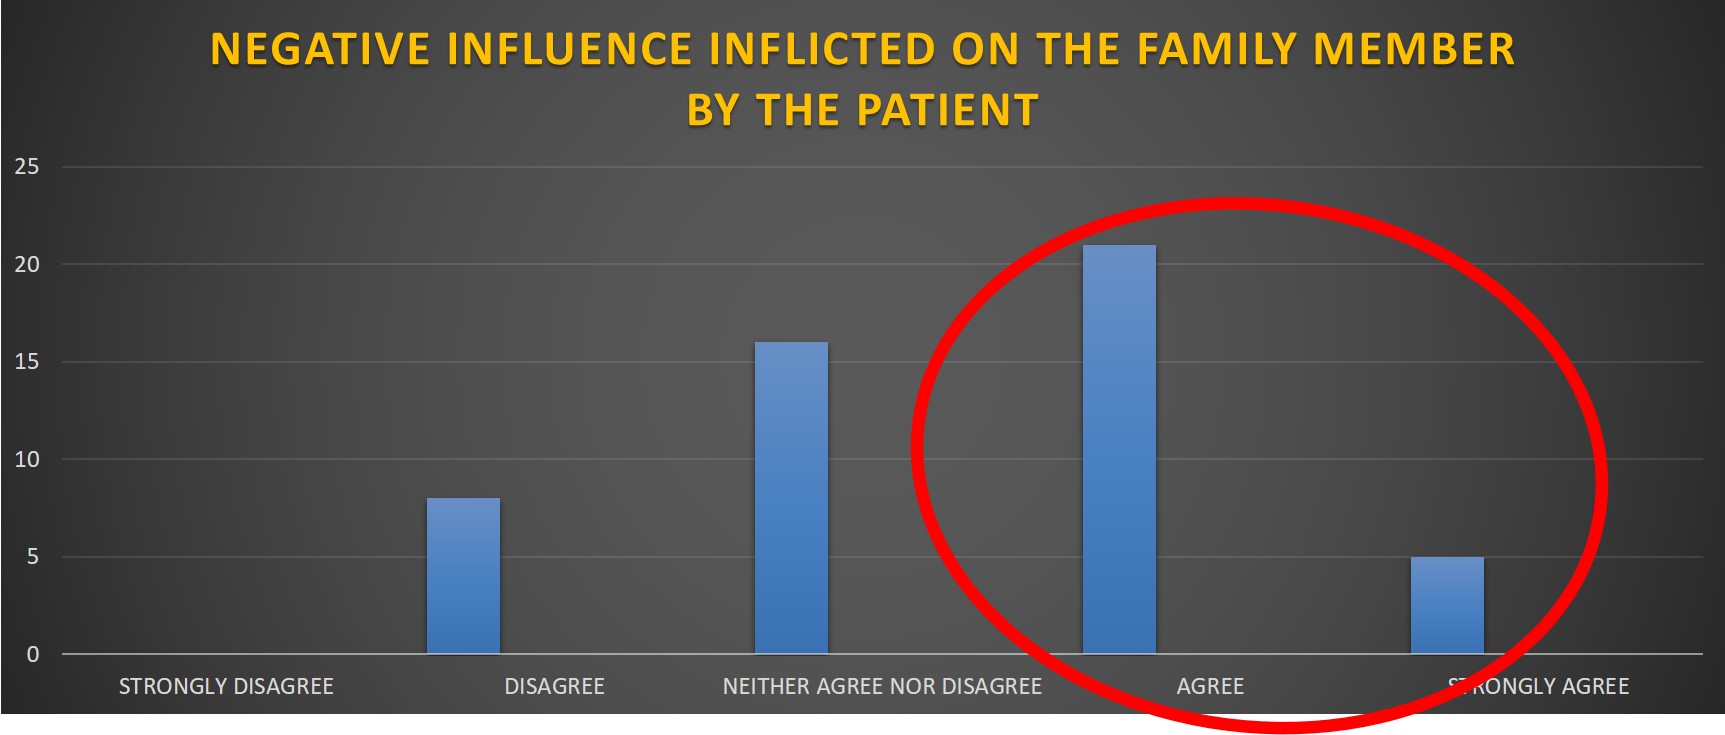

Supplement: Supplementary file 1 [file b8ff4ec64ed962a6c9245e50.docx]
